# Supplementary material for: Translation of Sindbis Subgenomic mRNA is Independent of eIF2, eIF2A and eIF2D
Source: PubMed Central journal article supplement (PMC5327398; doi:10.1038/srep43876), 2017-02-27
Supplement: srep43876-s1.pdf [file srep43876-s1.pdf]

## Supplementary Info

### **Translation of Sindbis Subgenomic mRNA is Independent of eIF2, eIF2A and eIF2D.**

Miguel Angel Sanz\*, Esther González Almela and Luis Carrasco

Centro de Biología Molecular Severo Ochoa (CSIC-UAM). Universidad Autónoma de Madrid.

28049, Madrid. Spain

\*Correspondence: +34-91-1964517; [masanz@cbm.csic.es](mailto:masanz@cbm.csic.es)

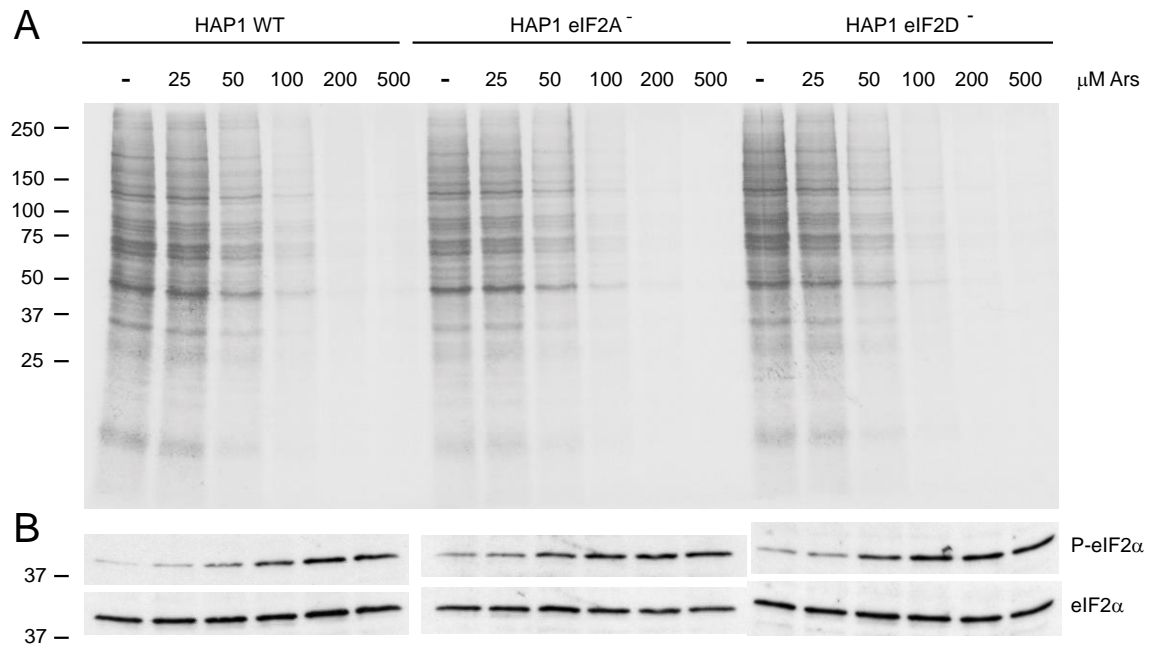

**Supplementary Figure 1. Effect of sodium arsenite treatment on protein synthesis and eIF2 $\alpha$  phosphorylation in HAP1 cell lines.** **A)** HAP1 WT, HAP1-eIF2A<sup>-</sup> and HAP1-eIF2D<sup>-</sup> cells previously seeded on coverslips in wells of an L-24 plate were left untreated or treated with different amounts of arsenite for 1 h and 15 min in labeling medium. Protein synthesis was analyzed by radioactive labeling with <sup>35</sup>S-Met/Cys during the last hour of treatment followed by SDS-PAGE and autoradiography. **B)** The amount of phospho-eIF2 $\alpha$  and total eIF2 $\alpha$  was analyzed in parallel by western blotting.
